# Supplementary material for: Emergence of blaNDM-1 and blaVIM producing Gram-negative bacilli in ventilator-associated pneumonia at AMR Surveillance Regional Reference Laboratory in India
Source: PubMed Central journal article supplement (PMC8425556; doi:10.1371/journal.pone.0256308), 2021-09-08

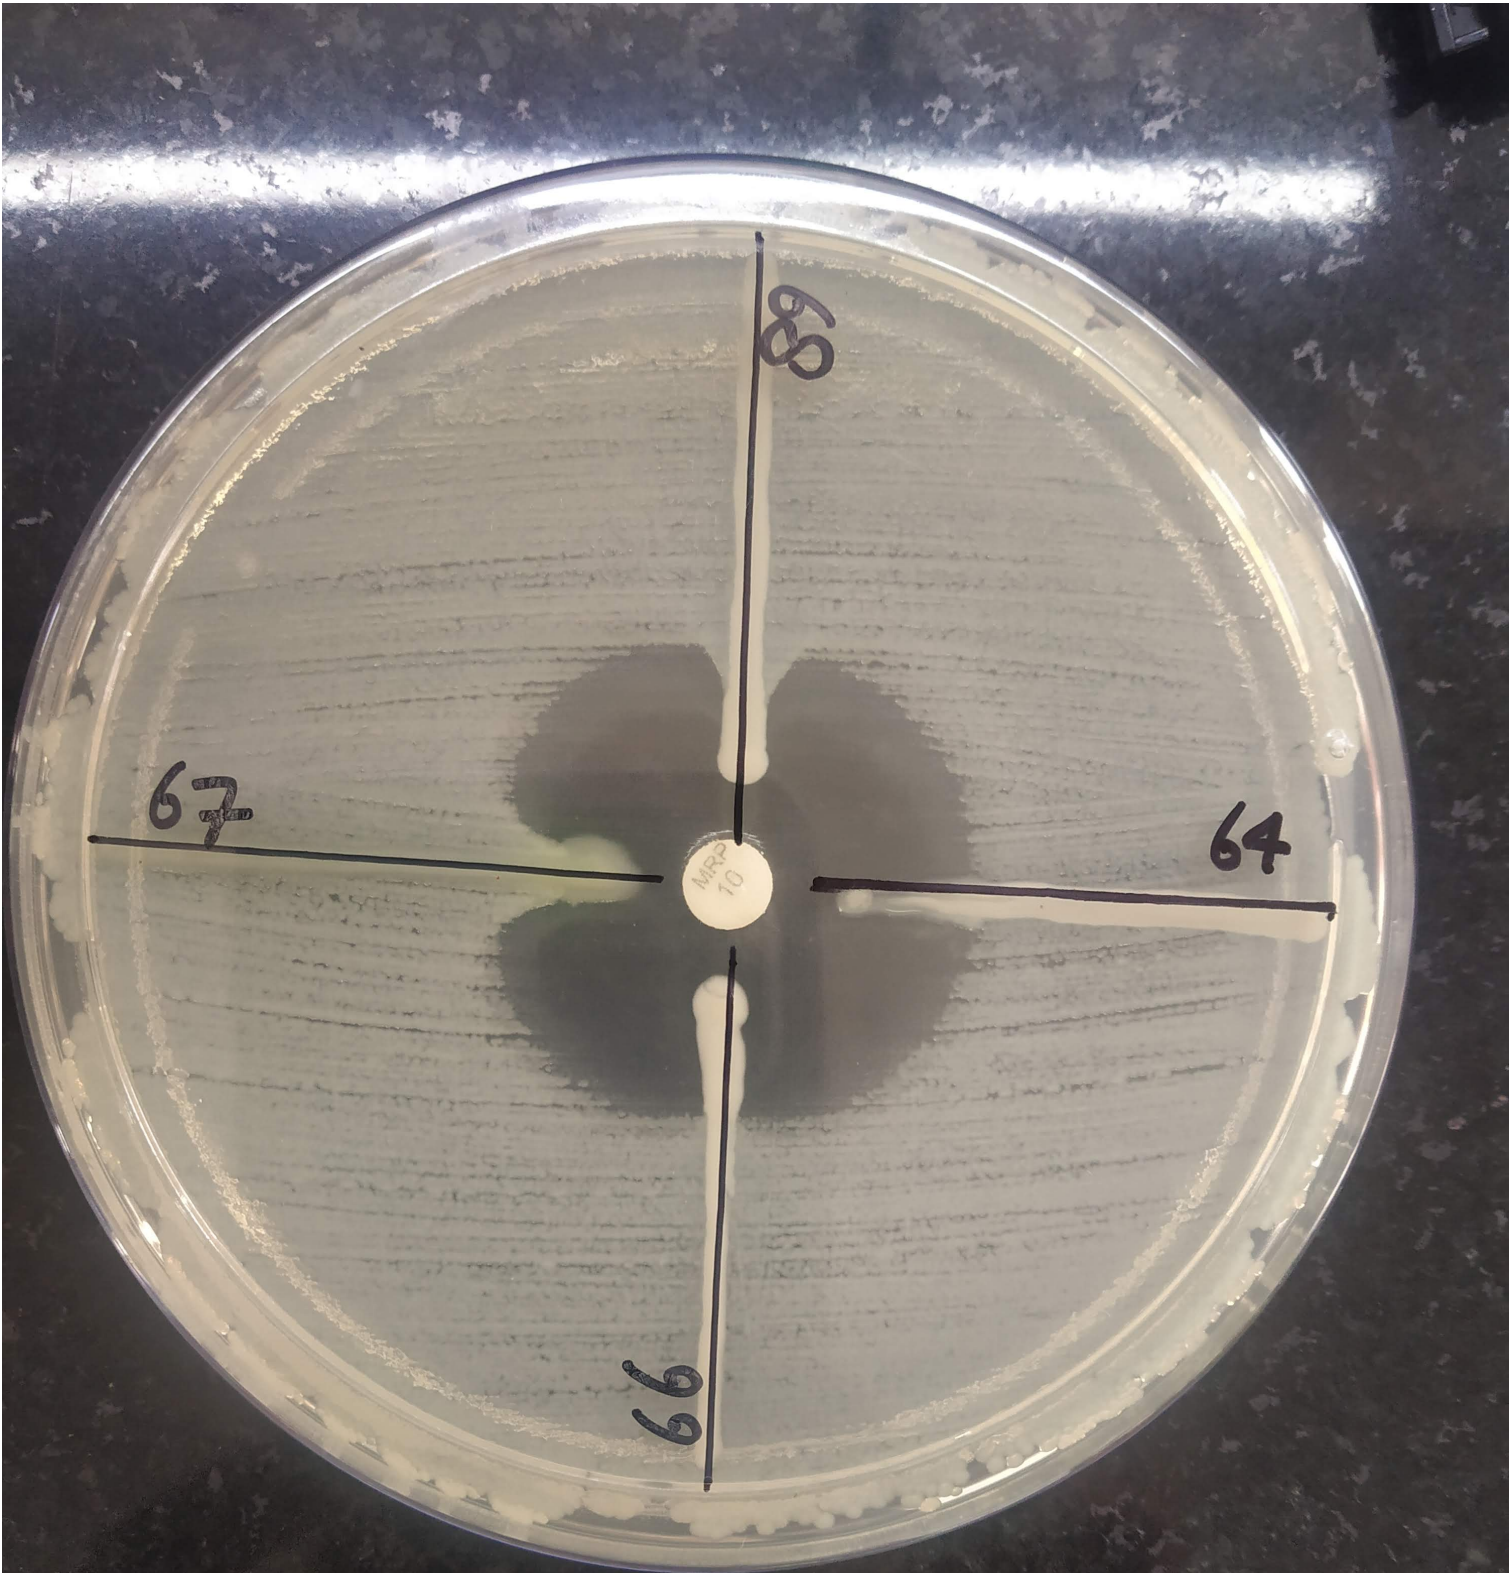



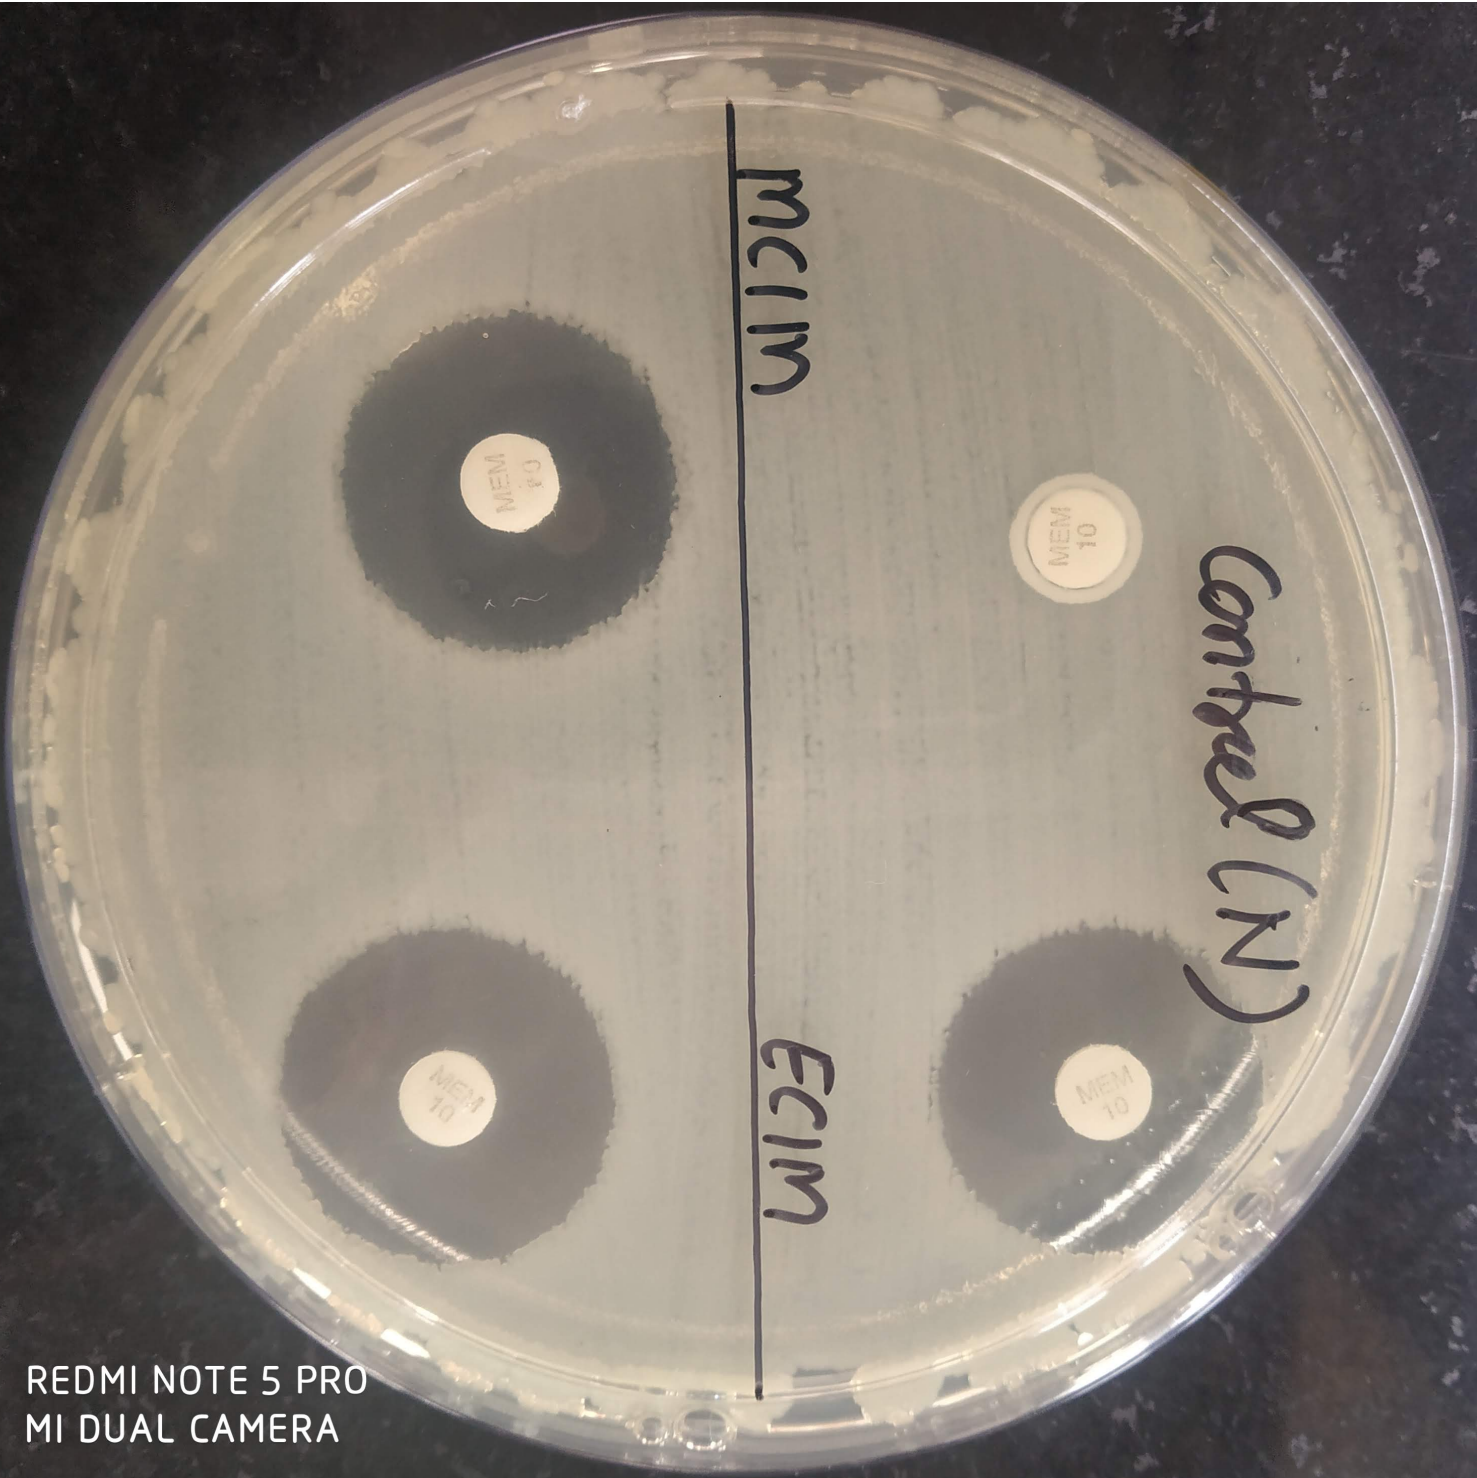

MCIIM

Control (N)

ECIM

MEM 10

MEM 10

MEM 10

MEM 10

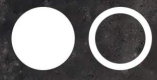

REDMI NOTE 5 PRO  
MI DUAL CAMERA

X X X X X X X X X X X X X X X

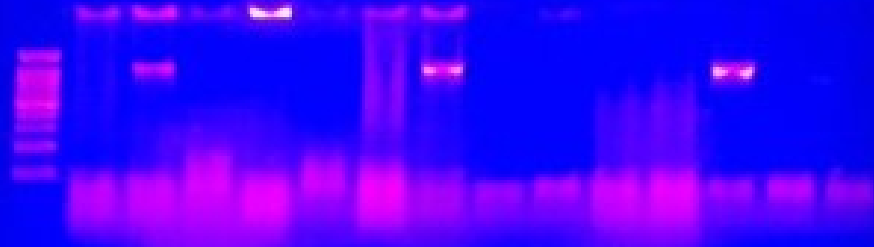

X X X X X X X X X X X X X X X X X

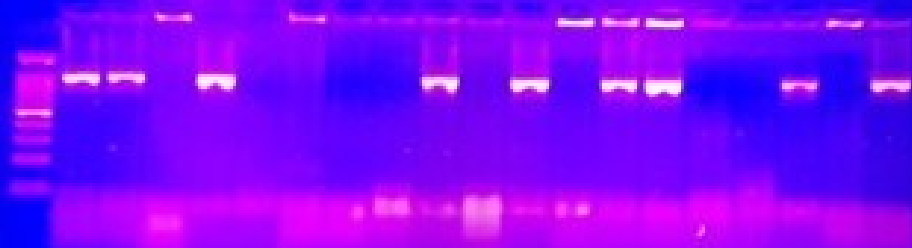

1 2 3 4 5 6 7 8 9 10 11 12 13 14 15

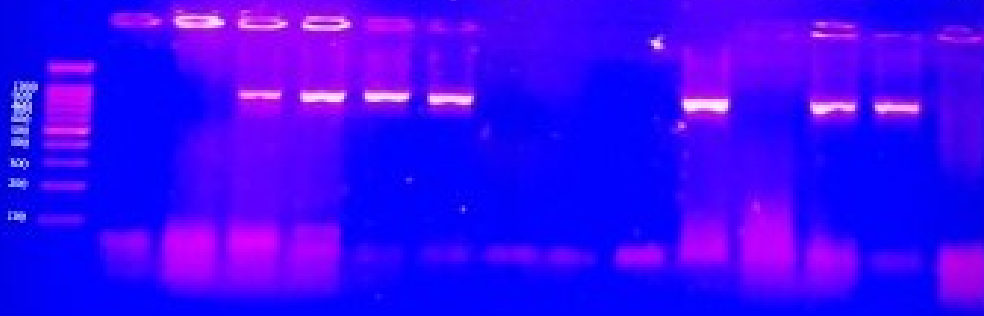

Supplement: pone.0256308.s001.pdf [file pone.0256308.s001.pdf]
